# Supplementary material
Source: MDPI journal article supplement (https://www.mdpi.com/2079-6412/8/12/448)
Supplement: s1 [file s1]

## Supplementary Materials

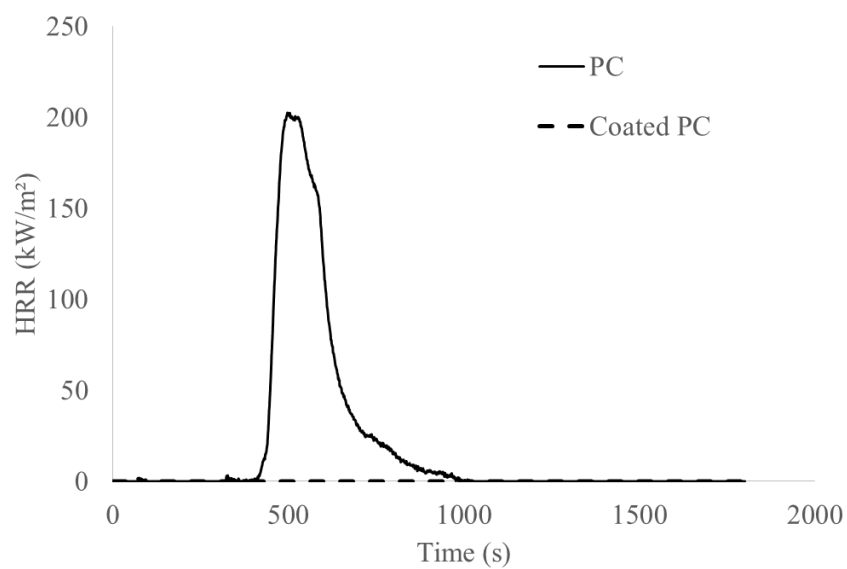

**Figure S1.** HRR curves obtained with PC and coated PC with the self-stratified epoxy/silicone compositions containing RDP and BDP FR additives at 2.5 wt.% and 5 wt.% (the four curves overlapped).
